# Supplementary material for: Self-assembly of transition-metal-oxide nanoparticle supraparticles with designed architectures and their enhanced lithium storage properties
Source: Royal Society of Chemistry journal article supplement (doi:10.1039/c6ta07184h), 2016-01-01
Supplement: c6ta07184h1.pdf [file c6ta07184h1.pdf]

Electronic Supplementary Information (ESI) for

**Self-assembly of transition-metal-oxide nanoparticle  
supraparticles with designed architectures and their enhanced  
lithium storage properties**

Guannan Guo,<sup>ab</sup> Li Ji,<sup>b</sup> Xiudi Shen,<sup>ab</sup> Biwei Wang,<sup>b</sup> Hanwen Li,<sup>b</sup> Jianhua Hu,<sup>a</sup> Dong Yang\*<sup>a</sup> and Angang Dong\*<sup>b</sup>

*<sup>a</sup>State Key Laboratory of Molecular Engineering of Polymers and Department of Macromolecular Science, Fudan University, Shanghai 200433, China.*

*<sup>b</sup>Collaborative Innovation Center of Chemistry for Energy Materials, Shanghai Key Laboratory of Molecular Catalysis and Innovative Materials, and Department of Chemistry, Fudan University, Shanghai 200433, China.*

\*To whom correspondence should be addressed: [agdong@fudan.edu.cn](mailto:agdong@fudan.edu.cn) (A.D.);  
[yangdong@fudan.edu.cn](mailto:yangdong@fudan.edu.cn) (Y. D.).

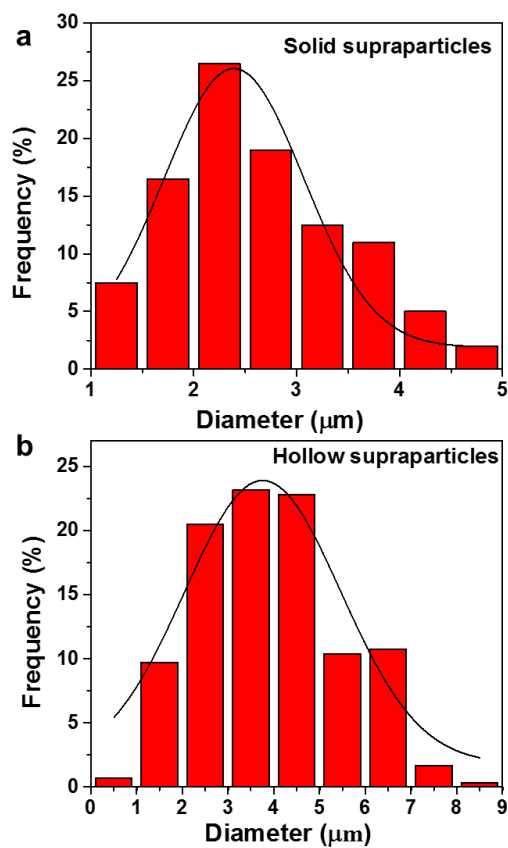

**Figure S1.** (a, b) Size distribution histograms of solid and hollow  $\text{Fe}_3\text{O}_4$  NP supraparticles, respectively. The average diameter of solid and hollow  $\text{Fe}_3\text{O}_4$  NP supraparticles was determined to be  $\sim 2.5$  and  $3.5 \mu\text{m}$ , respectively.

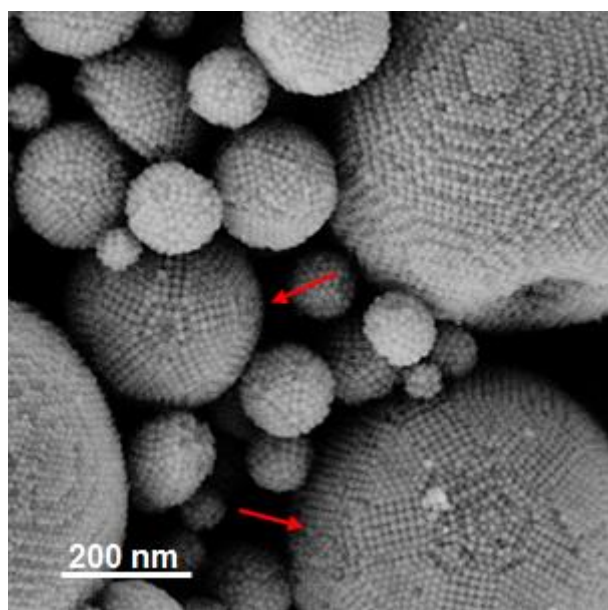

**Figure S2.** Representative HRSEM image of Fe<sub>3</sub>O<sub>4</sub> NP supraparticles, showing the co-existence of icosahedral supraparticles (indicated by red arrows) with FCC supraparticles.

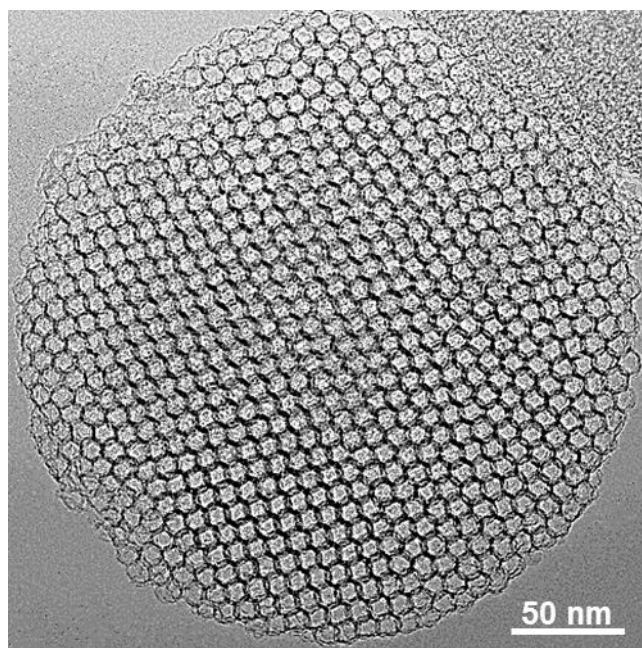

**Figure S3.** Typical TEM image of mesoporous carbon frameworks derived from the carbon-coated  $\text{Fe}_3\text{O}_4$  NP supraparticles after acid etching. The 3D ordered carbon frameworks suggested the interconnection of carbon shells.

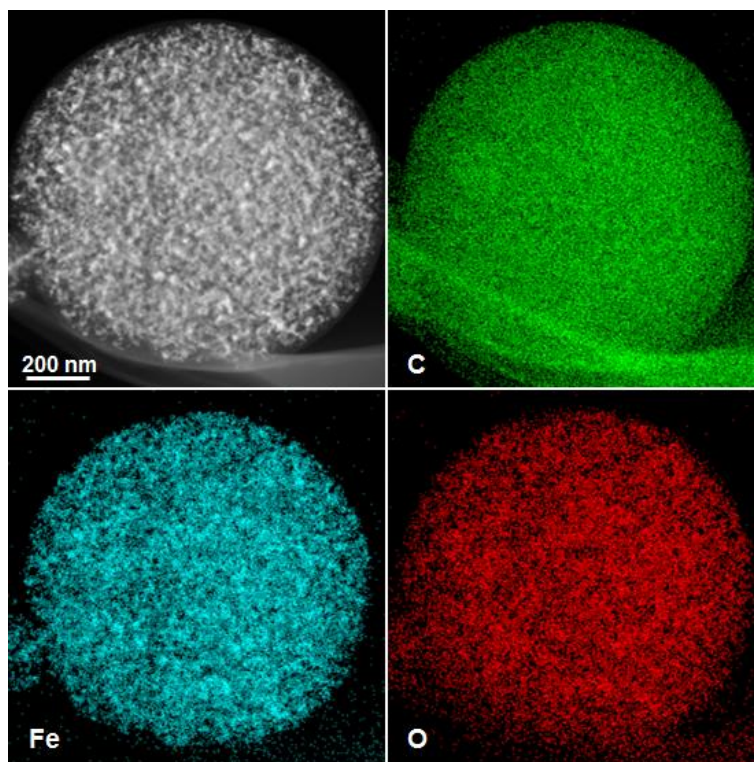

**Figure S4.** STEM image and the corresponding elemental mapping of a single  $\text{Fe}_3\text{O}_4$  NP supraparticles after ligand carbonization. The homogeneous distribution of carbon suggested the formation of a 3D continuous carbon network after *in situ* ligand carbonization.

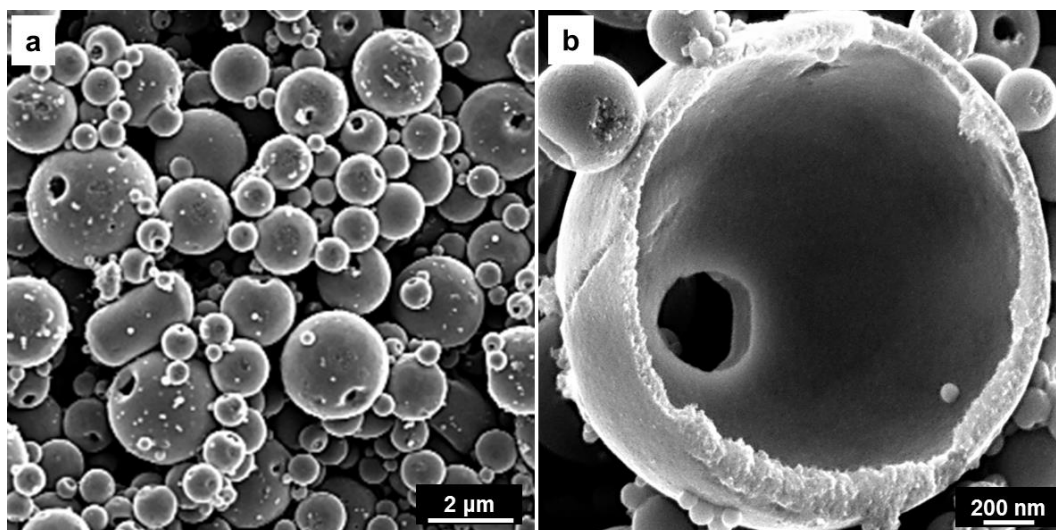

**Figure S5.** (a, b) SEM images of hollow supraparticles self-assembled from 6 nm  $\text{NiFe}_2\text{O}_4$  NPs.

**Table S1.** Electrochemical performance of representative Fe<sub>3</sub>O<sub>4</sub>-based anodes reported previously.

| Material                                                                    | Current density (mA g <sup>-1</sup> ) | Coulombic efficiency (1 <sup>st</sup> cycle) | Capacity (mAh g <sup>-1</sup> ) | Ref.             |
|-----------------------------------------------------------------------------|---------------------------------------|----------------------------------------------|---------------------------------|------------------|
| Porous Fe <sub>3</sub> O <sub>4</sub> /VO <sub>x</sub> / graphene nanowires | 100                                   |                                              | 1164                            | S1               |
|                                                                             | 2000                                  |                                              | 808                             |                  |
| Fe <sub>3</sub> O <sub>4</sub> @Fe <sub>3</sub> C-C yolk/shell nanospindles | 500                                   | 68.30%                                       | 1120 after 100 cycles           | S2               |
|                                                                             | 2000                                  |                                              | 604.8                           |                  |
| CNT@Fe <sub>3</sub> O <sub>4</sub> @C coaxial nanocables                    | 200                                   | 65.50%                                       | 1290 after 80 cycles            | S3               |
|                                                                             | 2000                                  |                                              | 690 after 200 cycles            |                  |
| Graphene-wrapped Fe <sub>3</sub> O <sub>4</sub> graphene nanoribbons        | 400                                   |                                              | 708 after 300 cycles            | S4               |
|                                                                             | 200                                   |                                              | 390 after 50 cycles             |                  |
| Fe <sub>3</sub> O <sub>4</sub> /Fe nanocomposites                           | 2000                                  |                                              | 260                             | S5               |
|                                                                             |                                       |                                              |                                 |                  |
| Hollow and yolk-shell Fe <sub>3</sub> O <sub>4</sub> nanostructures         | 1000                                  |                                              | 585 after 100 cycles            | S6               |
| Fe <sub>3</sub> O <sub>4</sub> /carbon composite microspheres               | 2000                                  | 72%                                          | 1022 for 150 cycles             | S7               |
|                                                                             | 5000                                  |                                              | 733                             |                  |
| Fe <sub>3</sub> O <sub>4</sub> /SnO <sub>2</sub> coaxial nanofibers         | 100                                   | 74%                                          | 850 after 50 cycles             | S8               |
|                                                                             | 200                                   |                                              |                                 |                  |
| Foam-like Fe <sub>3</sub> O <sub>4</sub> /C composite                       | 5000                                  |                                              | 1008 after 400 cycles           | S9               |
|                                                                             |                                       |                                              | 580                             |                  |
| Novel Fe <sub>3</sub> O <sub>4</sub> -CNTs nanocomposite                    | 92.8                                  |                                              | 850 after 100 cycles            | S10              |
| Carbon-coated Fe <sub>3</sub> O <sub>4</sub> nanosheets                     | 200                                   |                                              | 1232 after 120 cycles           | S11              |
|                                                                             | 1000                                  |                                              | 853                             |                  |
| Sandwich-structured Fe <sub>3</sub> O <sub>4</sub> @carbon                  | ~ 100                                 |                                              | 860 after 100 cycles            | S12              |
| C@Fe <sub>3</sub> O <sub>4</sub> @C coaxial nanotubes                       | 100                                   | 68%                                          | 1134 after 150 cycles           | S13              |
| Fe <sub>3</sub> O <sub>4</sub> nanoparticles on graphene foam               | 924                                   | 68%                                          | 1200 after 500 cycles           | S14              |
| Fe <sub>3</sub> O <sub>4</sub> nanoparticles on porous carbon               | 100                                   | 61%                                          | 1462 after 100 cycles           | S15              |
|                                                                             | 1000                                  |                                              | 676 after 500 cycles            |                  |
| <b>Hollow Fe<sub>3</sub>O<sub>4</sub> NP supraparticles</b>                 | <b>1600</b>                           | <b>70.8%</b>                                 | <b>1152 after 300 cycles</b>    | <b>This work</b> |

**References**

S1. Q. An, F. Lv, Q. Liu, C. Han, K. Zhao, J. Sheng, Q. Wei, M. Yan and L. Mai, *Nano Lett.*, 2014, **14**, 6250-6256.

- S2. J. Zhang, K. Wang, Q. Xu, Y. Zhou, F. Cheng and S. Guo, *ACS Nano*, 2015, **9**, 3369-3376.
- S3. J. Cheng, B. Wang, C. Park, Y. Wu, H. Huang and F. Nie, *Chem - Eur. J.*, 2013, **19**, 9866-9874.
- S4. L. Li, A. Kovalchuk, H. Fei, Z. Peng, Y. Li, N. D. Kim, C. Xiang, Y. Yang, G. Ruan and J. M. Tour, *Adv. Energy Mater.*, 2015, **5**, 1500171.
- S5. M. Lübke, N. M. Makwana, R. Gruar, C. Tighe, D. Brett, P. Shearing, Z. Liu and J. A. Darr, *J. Power Sources*, 2015, **291**, 102-107.
- S6. Z. Sun, K. Xie, Z. A. Li, I. Sinev, P. Ebbinghaus, A. Erbe, M. Farle, W. Schuhmann, M. Muhler and E. Ventosa, *Chem - Eur. J.*, 2014, **20**, 2022-2030.
- S7. S. H. Choi, Y. N. Ko, K. Y. Jung and Y. C. Kang, *Chem - Eur. J.* 2014, **20**, 11078-11083.
- S8. W. Xie, S. Li, S. Wang, S. Xue, Z. Liu, X. Jiang and D. He, *ACS Appl. Mater. Interfaces*, 2014, **6**, 20334-20339.
- S9. F. Wu, R. Huang, D. Mu, B. Wu and S. Chen, *Appl. Mater. Interfaces*, 2014, **6**, 19254-19264.
- S10. L. Yang, J. Hu, A. Dong and D. Yang, *Electrochim. Acta*, 2014, **144**, 235-242.
- S11. G. Gao, S. Lu, B. Dong, Z. Zhang, Y. Zheng and S. Ding, *J. Mater. Chem. A*, 2015, **3**, 4716-4721.
- S12. L. Zhao, M. Gao, W. Yue, Y. Jiang, Y. Wang, Y. Ren and F. Hu, *Appl. Mater. Interfaces*, 2015, **7**, 9709-9715.
- S13. Q. Qu, J. Chen, X. Li, T. Gao, J. Shao and H. Zheng, *Nano Lett.*, 2015, **3**, 18289-18295.
- S14. X. Hu, M. Ma, M. Zeng, Y. Sun, L. Chen, Y. Xue, T. Zhang, X. Ai, R. G. Mendes, M. H. Rummeli and L. Fu, *Appl. Mater. Interfaces*, 2014, **6**, 22527-22533.
- S15. L. Wang, L. Zhuo, C. Zhang and F. Zhao, *Chem - Eur. J.*, 2014, **20**, 4308-4315.
